# Supplementary material
Source: Elsevier journal article supplement (https://cris.unibo.it/retrieve/handle/11585/1014572/4c23e9d8-78a7-4757-9168-58d110da3078/mmc1.xlsx)
Supplement: mmc1 [file mmc1.xlsx]

## Sheet: respecta A
	lactobacillus	anaerococcus	atopobium	clostridium	dialister	eggerthella	finegoldia	fusobacterium	leptotrichia	megasphaera	mobiluncus	parvimonas	peptoniphilus	prevotella	sneathia	enterococcus	gardnerella	klebsiella	proteus	staphylo	strepto	ureaplasma	aerococcus	escherichia	pseudomonas	delftia	mycoplasma	GBS
MI37	85.6	0.02	0.008	0.02	0.001	0	0.003	0	0	0.004	0	0	0.004	0.005	0.0008	0.21	9.9	0.001	0	0.01	0.03	0.17	0.005	0.01	0.001	0	0.004	0.003
MI44	95	0.004	0.02	0.01	0	0	0	0	0	0.002	0	0	0.01	0	0	0.13	0.002	0.004	0	0.02	0.07	0	0.02	0.01	0.002	0	0.004	0.02
MI53	39.87	0	0.65	0.03	0	0	0	0	0	0.77	0	0	0.01	0	0	1.1	17.3	0.01	0	0.55	0.38	0	0.1	0.1	0.05	0	0	0.1
MI58	93.45	0	0.008	0.02	0	0	0	0.002	0	0.002	0	0	0.004	0	0	0.06	0.006	0.002	0	1.06	0.05	0	0	0.008	0.008	0	0.008	0.006
MI66	92.45	0	0.02	0.02	0	0	0	0	0	0	0	0	0.003	0	0	0.1	0	0.003	0	0.05	0.04	0	0.003	0.006	0	0	0.006	0.003
MI75	3.42	0	0.003	0.01	0	0	0	0	0	0.001	0	0	0.005	0	0	2.2	0.008	0	0	28.8	61	0.08	0.001	0.005	0	0	0.003	46.5
MI81	9.78	0.001	0.002	0.01	0	0	0	0	0	0	0	0	0.004	0.002	0	71.3	0	0.001	0	10.2	0.05	0.001	0	0.006	0	0	0.004	0.001
MI102	75.34	0.005	0.003	0.02	0	0	0.001	0.001	0	0	0	0	0.001	0.008	0	18.1	0.008	0	0	2.59	0.02	0	0.006	0	0	0	0.005	0
MI109	97.53	0	0.01	0.1	0.006	0	0.006	0	0	0.001	0	0	0.01	0.03	0	0.01	0.01	0	0	0.01	0.01	0.003	0.005	0	0.01	0	0.001	0
MI122	7.33	2.28	14	0.65	0.23	0.003	0.001	0	0	0.01	0.01	0	15.2	6.8	0.8	0.006	25.7	0.001	0	0.22	7	0	8.47	0	0	0	0	5.4
MI133	59.5	0	0	0.03	0	0	0	0	0	0	0	0	0	0	0	0.09	0.01	0	0	3.19	0.05	0.01	0	0.03	0.01	0	0	0
MO2	93.6	0	0.01	0.01	0	0	0	0	0	0.006	0	0	0.01	0	0.002	0.02	0.03	0.002	0	0.04	0.03	0.004	0.02	0.04	0.008	0	0.002	0
MO15	91	0	0	2.3	0	0	0	0	0	0.01	0	0	0.004	0	0	0.004	0.004	0	0	0.06	0.01	0	0.004	0.01	0.02	0	0	0
MO53	82.36	0.02	0	2.13	0.01	0	0.008	0.01	0	0	0	0	0.04	0.04	0.008	0.39	0.01	0	0.36	0.2	0.16	0	0.008	0.08	0	0	0	0.03
MO76	53.76	0.09	1.44	0.5	0.11	0.0009	0.06	0.05	0	6.5	0.08	0	0.3	0.8	0.13	0.006	14.08	0	0	0.01	0.03	0.22	1.27	0.0009	0	0	0.01	0
MO79	38.67	0.07	2.08	0.77	0.1	0	0.01	0.02	0	4.1	0	0	0.33	1.4	0.22	0.0076	33	0	0	0.02	0.03	0.03	1.7	0.01	0	0	0.002	0
MO80	94.52	0	0	0.04	0	0	0	0.06	0	0.02	0	0	0	0.04	0	0.2	0.01	0.01	0	0.21	0.04	0.09	0	0.09	0.03	0	0.02	0
MO98	76.22	0.023	0	5.29	0	0	0	0	0	0	0	0	0.011	0	0	0.04	0.19	0	0	0.1	0.1	0.05	0.01	0.05	0.02	0	0.02	0

## Sheet: respecta B
	lactobacillus	anaerococcus	atopobium	clostridium	dialister	eggerthella	finegoldia	fusobacterium	leptotrichia	megasphaera	mobiluncus	parvimonas	peptoniphilus	prevotella	sneathia	enterococcus	gardnerella	klebsiella	proteus	staphylo	strepto	ureaplasma	aerococcus	escherichia	pseudomonas	delftia	mycoplasma	GBS
MI37	77.1	0.007	0.001	0.01	0	0	0.003	0	0	0.001	0	0	0.007	0.001	0	9.3	8.1	0	0	1.25	0.06	0.08	0.003	0.01	0	0	0.003	0.01
MI44	88.02	0.02	0.007	0.03	0	0	0	0	0	0	0	0	0.02	0.007	0	0.02	0.03	0	0	0.04	0.05	0	0.003	0.003	0.01	0	0.01	0.003
MI53	3.21	0.004	0.15	0.01	0	0	0	0.0006	0	0.04	0	0	0.005	0.0006	0.001	50.15	9.66	0.0006	0	31.3	0.04	0.0006	0.02	0.01	0.004	0	0.003	0.005
MI58	97.24	0.0008	0.006	0.008	0	0	0	0	0	0	0	0	0.002	0	0	0.07	0.001	0	0	0.06	0.02	0.0008	0.004	0.009	0.0008	0	0.0025	0.003
MI66	97.8	0	0.009	0.01	0	0	0	0	0	0.001	0	0	0.008	0.001	0.005	0.11	0.004	0	0	0.09	0.03	0.002	0.007	0.03	0	0	0.004	0.002
MI75	17.68	0.01	0.004	0.02	0	0	0.01	0	0	0.002	0.01	0	0.12	0.006	0	0.12	0.01	0.004	0	0.09	75.66	0.17	0.008	0.03	0	0	0.008	60.5
MI81	2.51	0	0.001	0.004	0	0	0	0	0	0	0	0	0.0004	0	0.0004	58.9	0.001	0	0	33.3	0.01	0	0.001	0.001	0	0	0	0.001
MI102	14.08	0.001	0.0005	0.009	0	0	0	0	0	0	0	0	0.001	0	0.0008	36.6	0.001	0	0	45.4	0.01	0.0005	0.003	0.002	0	0	0.003	0.0003
MI109	72.91	0.001	0.02	0.01	0.02	0	0.07	0.04	0	0.03	0.008	0	0.05	0.01	0.001	20.6	0.9	0.001	0	0.09	0.05	0.05	0.004	0.004	0	0	0.005	0.007
MI122	2.69	0.86	24.2	0.7	0.11	0.003	0	0	0	0.06	1.4	0	8.02	1.5	10	0.07	17.8	0	0	0.04	6.4	0.02	12.1	0.01	0	0	0.002	4.5
MI133	9.52	0	0	0.009	0	0	0	0	0	0.0004	0	0	0.001	0	0	0.005	0.002	0.01	0	7.6	0.004	0.002	0	68.4	0.001	0	0.0004	0
MO2	88.8	0	0.008	0.01	0	0	0	0	0	0.008	0	0	0.008	0.008	0	0.02	0.02	0	0	0.05	0.19	0.008	0.01	0.01	0.03	0.008	0.008	0.03
MO15	94.7	0.004	0.002	1.18	0	0	0.01	0	0	0.006	0	0	0.008	0.009	0	0.03	0.004	0	0	0.06	0.02	0.004	0	0.03	0.01	0	0.004	0
MO53	90.33	0.004	0	2	0.01	0	0.009	0	0	0.0045	0	0	0.02	0.01	0	0.04	0.009	0.004	0	0.13	0.13	0.01	0.004	0.05	0.04	0	0	0.004
MO76	69.86	0.01	0.009	0.03	0	0	0.002	0	0	9.2	0	0	0.03	0.03	0.02	0.02	0.25	0	0	0.01	0.02	0.67	0.02	0.01	0.002	0	0.006	0
MO79	38.9	0.01	0.9	0.4	0.22	0	0.01	0.01	0	5.6	0.003	0	0.36	1.8	0.13	0.005	28.8	0	0	0.01	0.03	0.01	1	0.005	0.005	0	0.001	0
MO80	93.3	0.02	0	0.01	0.008	0	0.05	0.02	0	0.008	0	0	0.05	0.03	0.004	0.06	0.004	0	0	0.46	0.02	0.02	0.002	0.008	0	0	0.002	0
MO98	90.6	0.03	0.04	1.8	0	0	0	0	0	0.02	0	0	0.04	0.005	0.01	0.03	0.06	0	0	0.06	0.07	0.06	0.02	0.01	0.01	0	0.002	0

## Sheet: placebo A
	lactobacillus	anaerococcus	atopobium	clostridium	dialister	eggerthella	finegoldia	fusobacterium	leptotrichia	megasphaera	mobiluncus	parvimonas	peptoniphilus	prevotella	sneathia	enterococcus	gardnerella	klebsiella	proteus	staphylo	strepto	ureaplasma	aerococcus	escherichia	pseudomonas	delftia	mycoplasma
MI4	89.29	0	0.25	0.02	0	0	0	0	0	0	0	0	0.004	0	0	0.12	0.004	0.002	0	0.06	0	0	0.001	0.008	0.002	0	0.006
MI30	3.05	0	70.4	0.04	0	0.009	0	0	0	0	0	0	0.16	0	0	0.05	4.4	0.003	0	0.01	0.04	0.001	1.2	0.004	0.001	0	0.001
MI82	97.55	0	0.009	0.01	0	0	0	0	0	0	0	0	0	0	0	0.03	0.001	0.001	0	0.01	0.03	0.03	0	0.005	0.001	0	0.002
MI86	0.83	0	0.001	0.01	0	0	0	0.0005	0	0.0005	0	0	0.003	0	0	48.8	0.01	0.01	0	0.7	26.2	0.003	0.001	15.1	0	0	0.001
MI94	93.05	0.01	0.005	0.009	0	0	0	0	0	0.003	0	0	0.36	0	0	0.06	0.008	0.001	0	0.02	0.03	0	0.008	0.003	0	0	0.002
MI118	8.12	0	0.05	0.02	0	0	0	0	0	0.004	0	0	0.006	0.002	0	0.11	0.17	0	0	0.02	2.15	0.002	0.03	0.01	0	0	0.008
MI129	67.89	0.005	0.01	0.0075	0	0	0.002	0	0	0	0	0	0.02	0	0	6.9	0.02	0	0	22.3	0.02	0.002	0.22	0.002	0	0	0
MI132	58.8	0	0	0.33	0	0	0	0	0	0.33	0	0	0	0.66	0	1.66	2.65	0	0	1.99	1.32	0	0.99	0	0	0	0.33
MI134	96.77	0	0	0.02	0.001	0	0	0	0	0.003	0	0	0.003	0	0	0.93	0.001	0	0	0.03	0.03	0	0	0.003	0	0	0
MO25	89.8	0	0	0.03	0	0	0	0.01	0	0.01	0	0	0	0	0.04	0.03	0.02	0	0	0.09	0.14	0.02	0	0.03	0.01	0	0
MO47	75.16	0	0	0.003	0.01	0	0	0	0	0	0	0	0	0	0	0.11	19.6	0	0	0.01	0.07	0	0.003	0.16	0.003	0	0.003
MO48	82.54	0.03	0.44	0.005	0.002	0	0.02	0.03	0	0.002	0	0	0.005	0.002	0	0.15	2.9	0	0	0.25	0.04	6.7	0.002	0.05	0.005	0	0.007
MO93	91.32	0.02	0	0.009	0	0	0	0	0	0	0	0	0.03	0.009	0	0.15	0.009	0.004	0	0.15	0.009	0	0	0.04	0	0	0.004
MO96	92.31	0.03	0	0.02	0.02	0	0.04	0.05	0	0.006	0	0	0.03	0.13	0	0.23	0.01	0	0	0.23	0.04	0	0.006	0.06	0.01	0	0.003
MO107	96.39	0	0	0.02	0.002	0	0.01	0	0	0.008	0	0	0.002	0	0.002	0.02	0.02	0	0	0.07	0.03	0.002	0.002	0.05	0.005	0	0.005
MO108	94.02	0	0	0.01	0	0	0.06	0	0	0	0	0	0.03	0.006	0.006	0.03	0.006	0	0	0.05	0.01	0	0	0.02	0	0	0
MO112	85.78	0.02	0.005	0.07	0	0	0.02	0.005	0.005	0.01	0	0	0.15	0.03	0	0.12	0.03	0	0	0.09	0.09	0.23	0	0.07	0	0	0.01
MO131	92.04	0.004	0	0.01	0.29	0	0	0	0	0.004	0	0	0.02	0	0	0.03	0.008	0	0	0.09	0.03	0	0	0.03	0.01	0	0

## Sheet: placebo B
	lactobacillus	anaerococcus	atopobium	clostridium	dialister	eggerthella	finegoldia	fusobacterium	leptotrichia	megasphaera	mobiluncus	parvimonas	peptoniphilus	prevotella	sneathia	enterococcus	gardnerella	klebsiella	proteus	staphylo	strepto	ureaplasma	aerococcus	escherichia	pseudomonas	delftia	mycoplasma
MI4	92.2	0	0.05	0	0	0	0	0	0	0.003	0	0	0.009	0	0	0.09	0.003	0	0	0.1	0.02	0	0.005	0	0	0	0
MI30	1.06	0	42.9	0.03	0.03	0.001	0	0	0	0	0	0	0.05	0.002	0	2.8	4.1	0.001	0	34	0.01	0	1.4	0.002	0.001	0	0.001
MI82	83.92	0.004	0.0006	0.07	0.01	0	0.01	0	0	0.001	0.001	0	0.02	0.13	0.001	0.08	0.007	0	0	13.3	0.13	0.07	0.08	0.003	0	0	0.001
MI86	7.55	0	0.001	0.007	0	0	0.001	0	0	0	0	0	0.002	0	0	45.4	0.005	0	0	39	2.2	0.01	0.003	0.06	0	0	0.002
MI94	24.73	0	0.03		0	0	0.02	0.01	0	0.03	0.01	0	1.01	0	0	0.25	0.05	0	0	0.42	0.21	0	0.03	0.06	0.03	0	0.02
MI118	1.31	0	0.005	0.008	0	0	0.006	0	0	0.01	0.0008	0	0.004	0.006	0.003	21.2	0.03	0.01	0	15.1	0.004	0.009	0.01	50.1	0	0	0
MI129	95.21	0.006	0.39	0.04	0.001	0	0.008	0	0	0	0	0	0.01	0	0	0.05	0.42	0	0	0.03	0.02	0.13	0.01	0.02	0	0	0.001
MI132	98.07	0	0	0.06	0	0	0	0	0	0.001	0	0	0.001	0	0	0	0.005	0	0	0.007	0.02	0.005	0	0.02	0	0	0.001
MI134	98.6	0	0	0.01	0	0	0	0	0	0	0	0	0.01	0	0	0.002	0.007	0	0	0.004	0.02	0	0.007	0.009	0	0	0
MO25	93.6	0.03	0	0.04	0	0	0.01	0.003	0	0.003	0.003	0	0.008	0.011	0.005	0.17	0.06	0	0	0.06	0.09	0.05	0	0.04	0	0	0.008
MO47	78.49	0.007	0.002	0.04	0	0	0	0	0	0.016	0	0	0	0.016	0.002	0.03	14.2	0	0	0.04	0.04	0.009	0	0.02	0.004	0	0.004
MO48	68.22	0.04	0.36	0.004	0	0	0.04	0.01	0	0	0.004	0	0.01	0.01	0	0.11	3	0	0	0.12	0.15	19.8	0	0.03	0.004	0	0.03
MO93	79.56	0.03	0.01	0.02	0	0	0.01	0	0	0.04	0	0	0.04	0.04	0	0.79	0.02	0	0	0.93	0.36	0.006	0	0.06	0	0	0.01
MO96	96.34	0.01	0	0.02	0	0	0.001	0	0	0.004	0	0	0.01	0.001	0.001	0.13	0.006	0	0.02	0.1	0.02	0.007	0.2	0.01	0.003	0	0.01
MO107	91.23	0	0.01	0.01	0	0	0	0.004	0	0.02	0	0	0.01	0.01	0	0.02	0.1	0	0	0.02	0.03	0.004	0.004	0.01	0	0	0
MO108	88.6	0	0	0.01	0	0	0.01	0	0	0.005	0	0	0.01	0.005	0	0.13	0	0	0	0.02	0.06	0	0	0.06	0.01	0	0
MO112	90	0	0.02	2.64	0	0	0	0	0	0.01	0	0	0	0.008	0	0.25	0.01	0	0	0.21	0.02	0.27	0	0.03	0	0	0.004
MO131	82.54	0	0.009	0.02	0.5	0	0	0	0	0.004	0	0	0.12	0.004	0	0.05	0	0	0	0.07	0.09	0.01	0	0.03	0.03	0	0
